# Supplementary material for: Myelination induces axonal hotspots of synaptic vesicle fusion that promote sheath growth
Source: PubMed Central journal article supplement (PMC8445327; doi:10.1016/j.cub.2021.06.036), 2021-09-13
Supplement: mmc1.pdf [file mmc1.pdf]

**Current Biology, Volume 31**

**Supplemental Information**

**Myelination induces axonal hotspots  
of synaptic vesicle fusion  
that promote sheath growth**

**Rafael G. Almeida, Jill M. Williamson, Megan E. Madden, Jason J. Early, Matthew G. Voas, William S. Talbot, Isaac H. Bianco, and David A. Lyons**

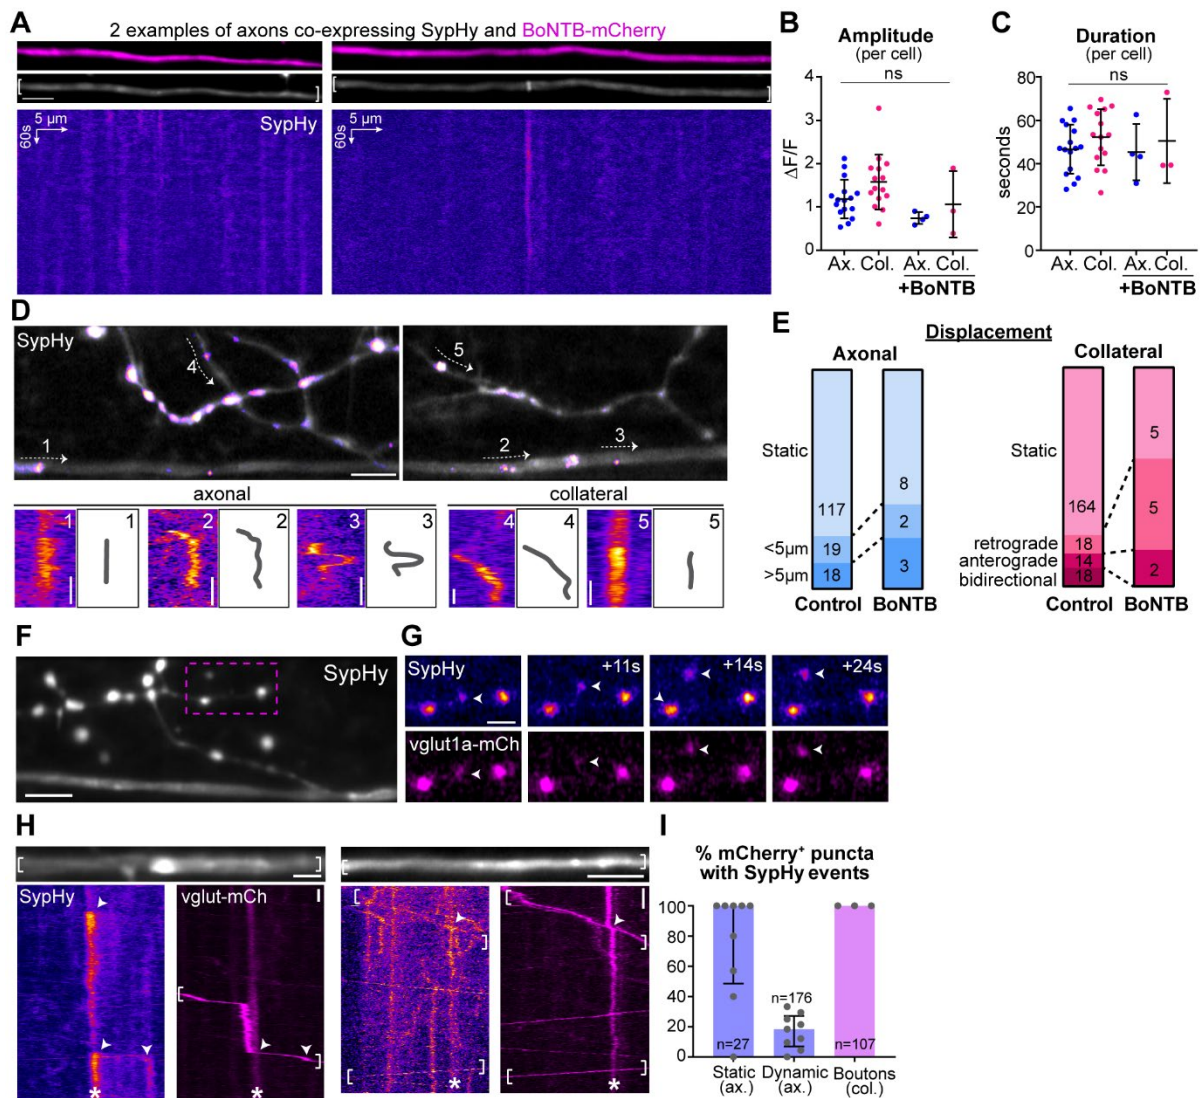

**Figure S1- Further SypHy characterization, related to Figure 1.**

A. Two examples of reticulospinal axons co-expressing SypHy and BoNTB-mCherry, which silences SypHy activity.

B-C. SypHy event amplitude and duration per cell; note trend to amplitude reduction in remaining events in BoNTB<sup>+</sup> axons. (B and C: all comparisons  $p > 0.05$ , ANOVA with Bonferroni's multiple comparisons correction. 16 control axons from 16 animals; 4 BoNTB axons from 4 animals, averaged per animal).

D-E. Kymographs of static and slightly displaced axonal and collateral events and quantification (binned into  $< 5\mu\text{m}$  or  $> 5\mu\text{m}$  cumulative displacement, retrograde, anterograde or bidirectional). Note proportional increase of dynamic events in silenced axons.

F-H. Examples of SypHy activity and concomitant vglut1a-mCherry vesicle trafficking in reticulospinal collaterals (G) and axons (H). Note SypHy events (e.g. arrowheads in H) and dynamic SypHy<sup>+</sup> puncta (brackets in H) co-localize with vglut1a-mCherry<sup>+</sup> puncta (asterisks) or trafficking particles (bracketed).

I. Quantification of SypHy and vglut1a-mCherry overlap as proportion of mCherry<sup>+</sup> puncta that co-localize with SypHy events in the imaging period. mCherry<sup>+</sup> static axonal puncta and boutons in collateral branches co-localize with SypHy, as do a proportion of dynamic axonal puncta (n indicates mCherry<sup>+</sup> axonal puncta from N=9 axons in 5 fish, and collateral puncta are in 3 axons in 3 animals). Scale bars:  $5\mu\text{m}$  (A-F),  $2\mu\text{m}$  (G-H), 60s (A-H). Graphs display mean and standard deviation.

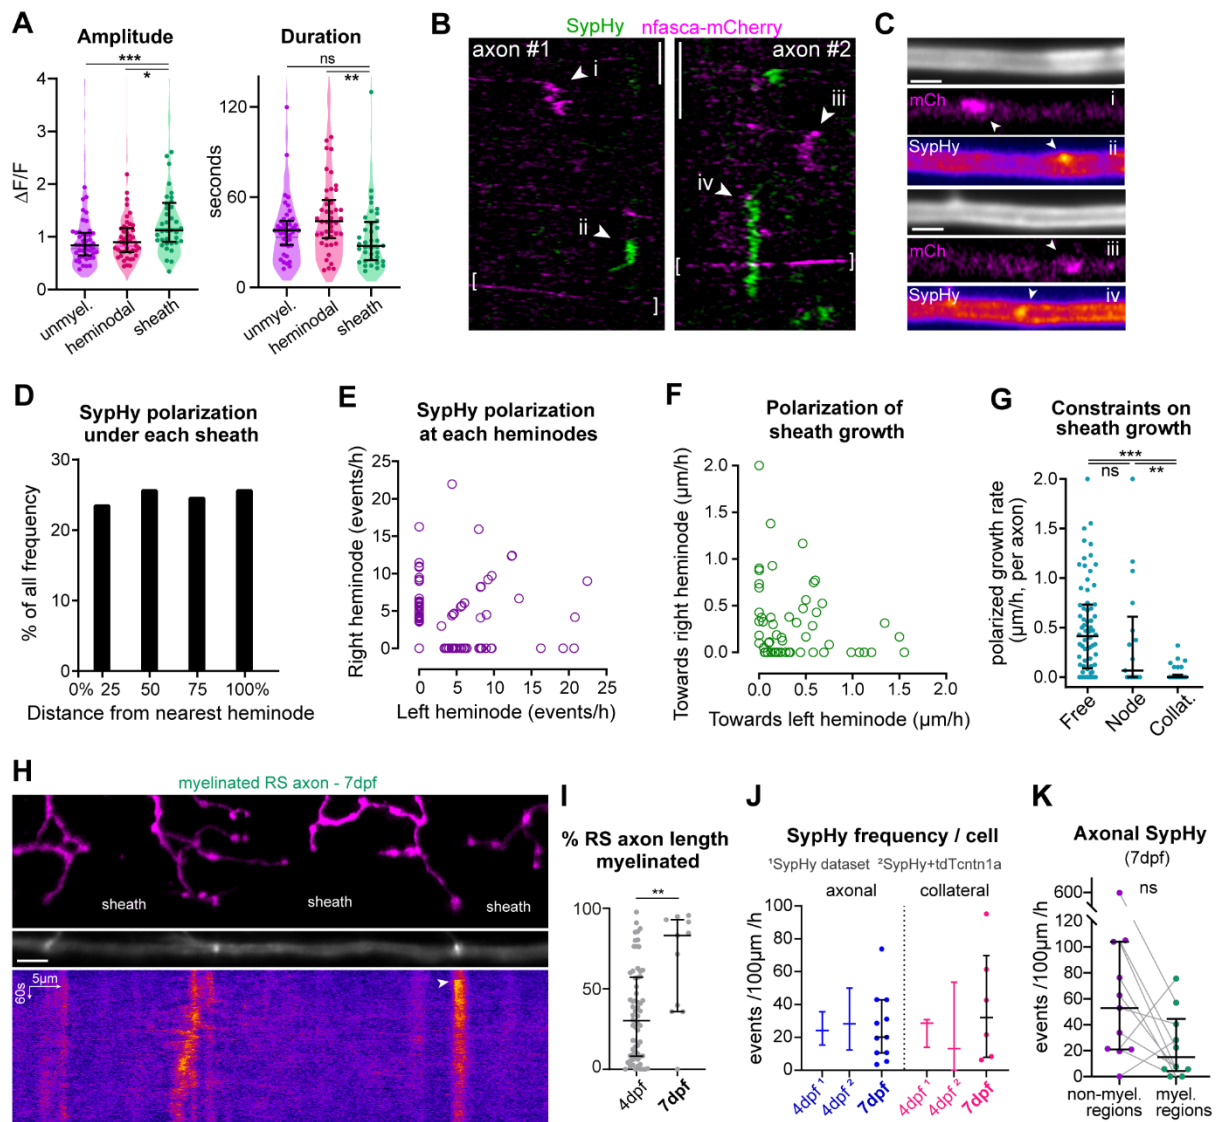

**Figure S2- Further SypHy-myelination characterization, related to Figures 2, 4-5.**

A. SypHy amplitude and duration in reticulospinal axons (amplitude:  $p < 0.001$  non-myelin. vs sheath,  $p = 0.012$  hemi vs sheath,  $p > 0.05$  non-myelin. vs hemi; duration:  $p = 0.003$  hemi vs sheath, other comparisons  $p > 0.05$ ; Kruskal-Wallis with Dunn's multiple comparisons test,  $N = 37-45$  axons).

B-C. Kymographs of two examples of SypHy and nfasca-mCherry trafficking (no co-localization). Frames corresponding to events i-iv shown in C.

D. SypHy polarization under each sheath (distance normalized to nearest heminode as 0% and to sheath centre as 100%). 50 sheaths, 35 axons, 33 animals.

E. Most sheaths show polarized heminodal SypHy activity. 161 sheaths, 60 axons, 52 animals.

F. Most sheaths grow asymmetrically towards one heminode. 66 sheaths, 32 axons, 30 animals.

G. Sheaths not flanked by nodes or collaterals grow faster ( $p = 0.213$  free vs node,  $p < 0.001$  free vs collateral,  $p = 0.039$  node vs collateral, Kruskal-Wallis with Dunn's multiple comparison test; 68 free heminodes, 17 node-flanked heminodes and 30 collateral-flanked heminodes, from 11-29 axons).

H-I. Increased myelination of reticulospinal axons at 7 dpf ( $p = 0.005$ , Mann-Whitney test, 66 RS axons in 57 animals at 4 dpf and 11 axons from 9 animals at 7 dpf).

J. Axonal and collateral SypHy frequency at 4 and 7 dpf (axon: all comparisons  $p > 0.05$ ; collat.: all comparisons  $p > 0.05$ ; Kruskal-Wallis with Dunn's multiple comparison test;  $N$  as in Fig 1, 2 and S2I).

K. SypHy frequency in myelinated regions of 7 dpf reticulospinal axons tends to be lower than at non-myelinated regions, similar to 4 dpf ( $p = 0.065$ , Wilcoxon matched-pairs signed rank test).

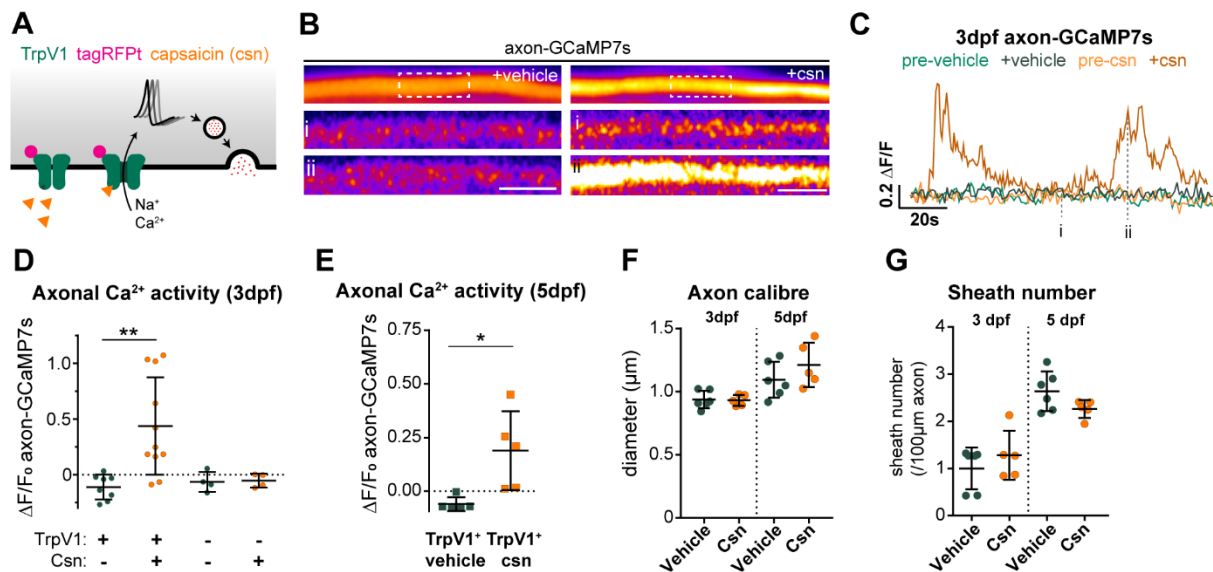

**Figure S3- Further chemogenetic stimulation characterization, related to Figure 6.**

A. Schematic depicting TrpV1 chemogenetic stimulation approach to increase vesicular fusion.

B. Axon-GCaMP7s in 3dpf TrpV1<sup>+</sup> axons, top panels are average projection, panels i and ii below are individual frames of the timepoints indicated in C. Only csn increases Ca<sup>2+</sup> activity.

C. Fluorescence time-course of boxed regions in B. Frames corresponding to timepoints i and ii displayed in B.

D-E. Quantification of average axonGCaMP7s activity at 3dpf (D) and 5dpf (E), showing specific increase in csn-treated TrpV1<sup>+</sup> axons (3dpf: csn vs vehicle treatment of TrpV1<sup>+</sup> axons:  $p=0.003$ , Student's t-test, 19 TrpV1<sup>+</sup> axons in 19 animals, 8 TrpV1<sup>-</sup> axons in 8 animals; 5dpf:  $p=0.017$ , 10 TrpV1<sup>+</sup> axons in 10 animals).

F. Reticulospinal axon calibre in control and stimulated axons ( $p>0.05$  for vehicle vs csn comparisons, ANOVA with Bonferroni's multiple comparison test,  $n=5-6$  axons from 5-6 animals).

G. Sheath number in control and stimulated axons ( $p>0.05$  for vehicle vs csn comparisons, ANOVA with Bonferroni's multiple comparison test,  $n=5-6$  axons from 5-6 animals).

Scale bars: 2μm (B). Graphs display mean and standard deviation.

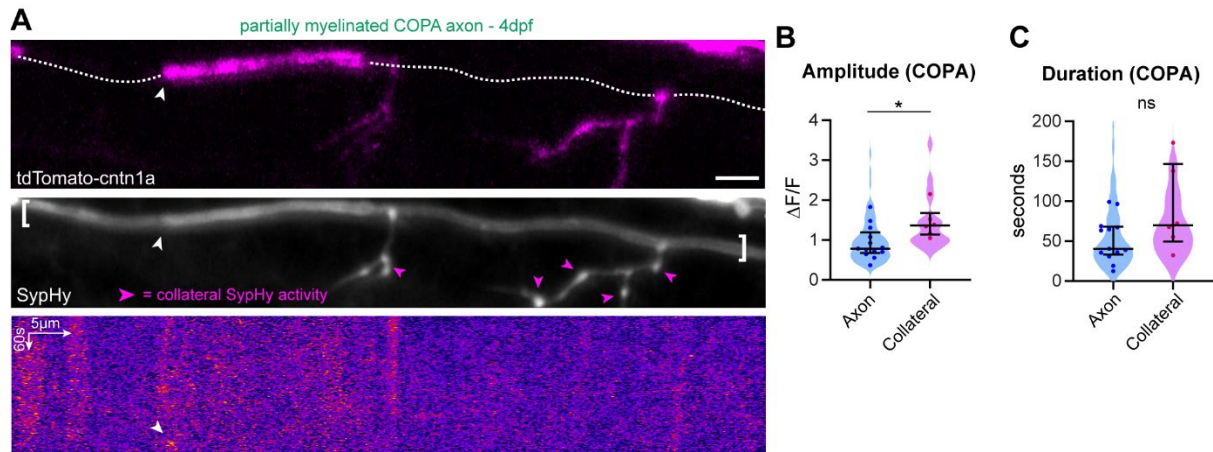

**Figure S4- Further SypHy characterization in COPA neurons, related to Figure 7.**

A. Example of SypHy activity along a partially myelinated COPA axon. Kymograph representative of bracketed axonal region.

B-C. Quantification of SypHy event amplitude and duration in COPA axons and collaterals (B:  $p=0.017$ , C:  $p=0.127$ , Mann-Whitney tests, 13 axons and collateral branches from 6 neurons).

Scale bars: 5μm (A). Graphs display median and interquartile range.

| Primer                | Sequence (5'-3')                                                                |
|-----------------------|---------------------------------------------------------------------------------|
| attB1-SypHy           | GGGGACAAGTTTGTACAAAAAAGCAGGCTGCCACCATGGACGTGGTGA                                |
| attB2R-SypHy          | GGGGACCACTTTGTACAAGAAAGCTGGGTTTACTGATTGGAGAAGGAGGTGGGCGCAC                      |
| attB4-polyA           | GGGGACAACCTTTGTATAGAAAAGTTGAAAAAACCTCCACACCTCCCC                                |
| attB1R-SypHy          | GGGGACTGCTTTTTTTGTACAAACTTGGCCACCATGGACGTGGTGAATCAGCTGG                         |
| attB2-TRPV1           | GGGGACAGCTTTCTTGTACAAAGTGGGCCACCATGGAACAACGGGGCTAGC                             |
| attB3R-polyA          | GGGGACAACCTTTGTATAATAAAGTTGAAAAAACCTCCACACCTCCCCCTG                             |
| attB1-jCaMP7          | GGGGACAAGTTTGTACAAAAAAGCAGGCTGCCACCATGGTCGACTCATCACGTC                          |
| attB2R-jCaMP7         | GGGGACCACTTTGTACAAGAAAGCTGGGTTTACTTCGCTGTCATCATTGTACAAAC                        |
| attB1R-GAP43          | GGGGACTGCTTTTTTTGTACAAACTTGGCCACCATGCTGTGCTGTATGAGAA                            |
| GAP43-fwd             | CATGCTGTGCTGTATGAGAAGAACCAAACAGGTTGAAAAGAATGATGAGGACCAAAGAT<br>TGGTAG           |
| GAP43-rev             | CATGCTACCAATCTTTTGGTCTCATCTTCTTTCAACCTGTTGGTTCTTCTCATAACAGCA<br>CAG             |
| zftdTomato fwd        | /5Phos/ATGGTTTCAAAGGCGAAGAAG                                                    |
| zftdTomato rev        | /5Phos/CTTGTAAGCTCATCCATTCCG                                                    |
| zfcntn1a signal Rev   | GGTCCCGAAGCCTGCAGACTCACC                                                        |
| zfcntn1a Fwd          | CCGGTGTTCGAGGAGCAGCCGC                                                          |
| attB1_TRPV1_fwd       | GGGGACAAGTTTGTACAAAAAAGCAGGCTGCCACCATGGAACAACGGGC                               |
| attB2R_TRPV1_rev      | GGGGACCACTTTGTACAAGAAAGCTGGGTTTAAATTGTACAGCTCGTCCATGC                           |
| attB2-BoNTB           | GGGGACAGCTTTCTTGTACAAAGTGGGCCACCATGCCCCGTGACAATTAACA                            |
| attB2-nfasca          | GGGGACAGCTTTCTTGTACAAAGTGGGCCACCATGTGGACACAGAGGCGGTGGGC                         |
| attB3R-mCherry        | GGGGACAACCTTTGTATAATAAAGTTGTTTACTTGTACAGCTCGTCCATGCC                            |
| gap43-fwd             | CATGCTGTGCTGTATGAGAAGAACCAAACAGGTTGAAAAGAATGATGAGGACCAAAGAT<br>TGGTAG           |
| gap43-rev             | CATGCTACCAATCTTTTGGTCTCATCTTCTTTCAACCTGTTGGTTCTTCTCATAACAGCA<br>CAG             |
| attB1R-GAP43dipalm    | GGGGACTGCTTTTTTTGTACAAACTTGGCCACCATGCTGTGCTGTATGAGAA                            |
| MyrfF                 | AACTGTGCGTAGGAACACGATA                                                          |
| MyrfR                 | TGGACCTCCGTGAAACAACCTG                                                          |
| EcoRI-Kozac-nfasca-F  | GAATTCCACCATGTGGACACAGAGGCGG                                                    |
| nfasca-NotI-R         | GCGGCCGCTATGCCAAAGAGTAGATGGC                                                    |
| nfasca-HA-R           | AGCGTAGTCTGGGACGTCGTATGGTACTGGATCTTTGGGTCCAG                                    |
| nfasca-HA-F           | TACCCATACGACGTCCAGACTACGCTCAAGAGCTGAAACAGCCC                                    |
| nfasca-AgeI-R         | ATCTTGGTGCTGGACAAG                                                              |
| SacI-nfasca-mCherry-F | GAGCTCAGAAGCCACATCACCTGTCAATGCCATCTACTCTTTGGCAATGGTGAGCAAGGGC<br>GAG            |
| mCherry-NotI-R        | GCGGCCGCTACTTGTACAGCTCGTCCATGCC                                                 |
| slc17a7aF             | ATGGAGATCCGTCGGACCGCTTAAAG                                                      |
| slc17a7aR             | CTATGTGAGCTCTCTTTCTCCCTCTCCCC                                                   |
| attB2-vglut1a         | GGGGACAGCTTTCTTGTACAAAGTGGGCCACCATGGAGATCCGTCCGGACC                             |
| vglut1a-mCherry rev   | CGGACCCTCCGCCTCTGTGAGCTCTCTTTCTCC                                               |
| vglut1a-mCherry fwd   | GGAGGCGGAGGGTCCGTGAGCAAGGGCGAGG                                                 |
| attB1-EGFP            | GGGGACAAGTTTGTACAAAAAAGCAGGCTGCCGCCACCATGGTGAGCAAGGGCGAGGAG                     |
| attB1-BoNTB           | GGGGACAAGTTTGTACAAAAAAGCAGGCTGCCACCATGCCCCGTGACAATTAACA                         |
| 2A-EGFP rev           | GTCTCCTGCTTGTCTTAAACAGAGAGAAGTTCGTGGCTCCGGATCCCTTGTACAGCTCGTCCA<br>TGCCG        |
| 2A-(ss)entn1a fwd     | GCCACGAACCTTCTCTGTAAAGCAAGCAGGAGACGTGGAAGAAAACCCCGTCTATGA<br>TTCCAGAGGCCTTCCAGC |
| attB2R-cntn1a         | GGGGACCACTTTGTACAAGAAAGCTGGGTTTCAAGAGCATCAGAGTCCAGAGGAGC                        |

**Table S1 – Primers used in this study. Related to STAR Methods**
